# Supplementary material
Source: Springer Nature journal article supplement (https://www.springermedizin.de/resource/supplementary/12936_2013_2764_MOESM7_ESM.pdf/9544214)

Sporozoite rate

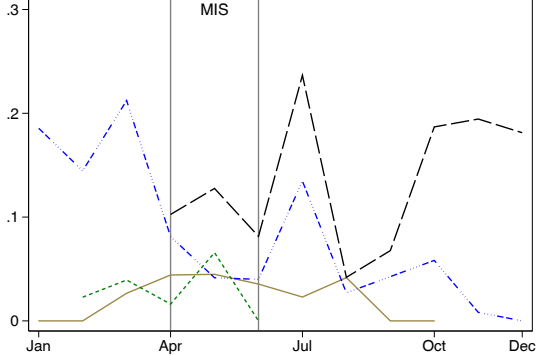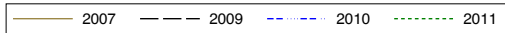

Supplement: MOESM7 [file 9544214]
